# Supplementary material
Source: Research Square preprint supplement (doi:10.21203/rs.3.rs-9520024/v1)
Supplement: Supplementary file 1 [file 588a1a7af2668c2d68b87a40.docx]

## Appendix A: Interview script example:

| **Warm Up/Background Questions**   1. I have done some research on [project], but in your words, can you tell me what it is? 2. My understanding is that you’re standing up a data access committee for this study, can you tell me about that? 3. What led you as a group to participate in the CHIRON study?    1. What was the motivation?    2. Is there anything specific you’re hoping CHIRON might help with?   **Current Processes Questions**   1. Can each of you tell me what your job title is and what you do at [organization]?    1. Can you tell me about your roles as planning leaders of this DAC? 2. Do you currently work exclusively on [project], or do you have other studies or projects? 3. What is the status of this DAC? What has happened so far in its development and what still needs to be done?    1. So you [number] are the planning leaders, how many other people are/will be on it? What roles will there be? 4. Can you give me an overview of what the purpose of this DAC will be, and what it will do? 5. Have you created or been part of a data access committee in the past?    1. (If yes) what were the biggest frustrations or barriers that you experienced?   **Current Group Harm Approach Questions**   1. When you hear the term ‘research ethics,’ what does that mean to you, or what thoughts come to mind?    1. How about ‘group harm’? 2. How do these topics come up in your work? 3. Do you have any specific approaches or routines that aim to address those kinds of concerns? 4. What would you say are the biggest difficulties or frustrations that you face when it comes to addressing these kinds of concerns?   **Wrap Up Questions**  Alright we’re almost done, just a couple wrap-up questions.   1. Have any of you visited the CHIRON website yet?    1. If you don’t mind **not** looking at it until your first exploration meeting, that would be great, just so that we can get first impressions.    2. (If yes) Was it a brief glance, or more than that? 2. And those were all my questions, is there anything I haven’t asked about that you think I should know? |
| --- |

## Appendix B: Exploration guide example:

| **Meeting Details Zoom Link:** [link]  **Length:** 1 hour  **Agenda:**   - Tool 8: Sharing the Word **(Task 1)** - Documentation: “Communicating About Biorepository Research with Communities” **(Task 2)**   **Notes:**   - Tasks do not need to be completed in this order! Feel free to explore these pages in whatever order feels natural. - We encourage you to respond to these discussion questions, but feel free to skip any if you feel you’ve already addressed them in your discussion.   **Tasks and Questions**  **Task 1**   - Navigate to the [CHIRON website](https://sites.google.com/sagebase.org/chiron/home) and locate Tool 8. - Carefully explore Tool 8 as if you were evaluating it for potential use in your work. Read through each question. - Voice your thoughts about what you’re seeing, even if they seem minor.   **Questions:**   1. On a scale of 1-5 (1 being the least and 5 being the most), how relevant does this tool seem to you and your work? (The two of you may give different ratings.)    1. Please discuss why you gave this rating(s). 2. How well (or not well) does this tool address the challenges and goals you identified in the proposal review phase? What’s missing? 3. Can you envision a use for this tool – or any part(s) of this tool – in your work?    1. If so, how can you envision using it? If not, what do you think it lacks?    2. Can you think of any specific changes (big or small) that would make this tool more useful to you?    3. Are there any parts of the tool that you think would be more useful than others? 4. Regarding the question “How will you share your insights?” Are there any options not listed that you think should be included? 5. Was anything confusing or unclear within this tool? 6. Does the content of the tool align with anything your organization/working group already does or facilitates? 7. Did the content of the tool offer you any new perspectives? 8. Was there anything specific that you found unnecessary or off-putting within this tool?   **Task 2**   - If you have not already, please navigate to the documentation piece titled “Communicating About Biorepository Research with Communities”. - Please read the piece from beginning to end. Feel free to pause your commentary while reading.   **Questions:**   - On a scale of 1-5 (1 being the least and 5 being the most), how relevant does this piece seem to you and your work? (The two of you may give different ratings.)   1. Please discuss why you gave this rating(s). - How well (or not well) does this piece address the challenges and goals you identified in the proposal review phase? What’s missing? - Can you envision a use for this piece of documentation in your work?   1. If so, how can you envision using it? If not, what do you think it lacks?   2. Can you think of any specific changes (big or small) that would make this piece more useful to you? - Was anything unclear within or about this piece? - How familiar were you with the topics discussed in this piece? - Does this piece align with anything your organization already does or facilitates? - Did you encounter anything in this piece that you disagreed with or found off-putting? - Who do you think is the most suitable audience(s) for this documentation piece, and why? |
| --- |
